# Supplementary material
Source: PubMed Central journal article supplement (PMC3379890)
Supplement: NIHMS266445-supplement-1_si_001.pdf [file NIHMS266445-supplement-1_si_001.pdf]

## SUPPORTING INFORMATION

### **Nanomechanical stimulus accelerates and directs the self-assembly of silk-elastin-like nanofibers**

Jonathan Chang<sup>1</sup>, Xiu-Feng Peng<sup>3</sup>, Karam Hijji<sup>1</sup>, Joseph Cappello<sup>4</sup>, Hamidreza Ghandehari<sup>5</sup>, Santiago D. Solares<sup>6</sup> and Joonil Seog<sup>1,2\*</sup>

<sup>1</sup>*Department of Materials Science and Engineering and* <sup>2</sup>*Fischell Department of Bioengineering, University of Maryland, College Park, MD, USA*

<sup>3</sup>*Department of Biomedical Engineering, Case Western Reserve University, Cleveland, OH, USA*

<sup>4</sup>*Protein Polymer Technologies, Inc., San Diego, CA, USA*

<sup>5</sup>*Departments of Pharmaceutics and Pharmaceutical Chemistry and Bioengineering, Utah Center for Nanomedicine, Nano Institute of Utah, University of Utah, UT, USA*

<sup>6</sup>*Department of Mechanical Engineering, University of Maryland, College Park, MD, USA*

\*Corresponding author email: [jseog@umd.edu](mailto:jseog@umd.edu)

## **Description of AFM Simulation Approach:**

We performed AFM numerical simulations by integrating two coupled differential equations of motion corresponding to the first and second cantilever eigenmodes in order to obtain trajectories of the tip position and tip-sample interaction force as a function of time.<sup>1-3</sup> The second cantilever eigenmode was included, as it is known that it can be momentarily excited in liquid environments.<sup>1-2</sup> This momentary excitation gives rise to additional high-frequency oscillations within each cycle of the fundamental eigenmode, which can have a significant effect on the tip-sample force trajectory.<sup>1-2</sup> As in the experiments, our simulations used base cantilever excitation. We tracked both the actual tip position and photodetector (cantilever tip slope) readings which have different values for base excitation AFM systems, especially in highly damped environments.<sup>4</sup> We drove the cantilever using the tapping-mode (amplitude modulation<sup>5</sup>) scheme, controlling the cantilever base position through a proportional-integral loop using either the tip oscillation amplitude or the photodetector amplitude as the feedback parameter. Repulsive tip-sample interactions were introduced through the Derjaguin-Müller-Toporov (DMT) contact model, adopting approximate parameters for tip and sample elasticity corresponding to our experimental system. Attractive interactions were not

included since they are significantly screened in liquid environments.<sup>1-2</sup> The parameters common to all simulations are summarized in Table S1.

To estimate a range for the maximum tapping force (as opposed to a single value in an ideal steady-state simulation in which every oscillation cycle is identical), we considered AFM control capability, which was quantified through the standard deviation of the experimental amplitude error signal (instantaneous amplitude minus amplitude setpoint) for full scans. Thus, for a given nominal amplitude setpoint we considered various simulations in which the amplitude was set to be equal to different values within the experimentally determined interval, with maximum deviations of three standard deviations from the setpoint in either direction (the values of the base excitation amplitude were selected such that the desired free oscillation amplitude of the tip was obtained). The highest tip-sample forces occurred for the lowest amplitude values in the interval (this is not always true in tapping-mode AFM<sup>6</sup>). As already stated, the standard deviation of the amplitude was determined from the experimental amplitude data by fitting the histogram obtained throughout full 2D scans (such as those shown in Figure 1 of the main manuscript) to a Gaussian function, as illustrated in Figure S1. Examples of typical amplitude control capability in our experiments are provided in Table S2.

**Table S1.** Parameters used in the AFM simulations

|                                        |                                     |
|----------------------------------------|-------------------------------------|
| Fundamental cantilever eigenfrequency  | 14.5 kHz                            |
| Second cantilever eigenfrequency       | 90.625 kHz                          |
| Cantilever (base) excitation frequency | 14.5 kHz                            |
| Fundamental eigenmode force constant   | 0.003 N/m                           |
| Second eigenmode force constant        | 0.1172 N/m                          |
| Fundamental eigenmode quality factor   | 2                                   |
| Second eigenmode quality factor        | 6                                   |
| Tip and sample Poisson ratio           | 0.3                                 |
| Tip modulus of elasticity              | 130 GPa                             |
| Sample modulus of elasticity           | 2 GPa                               |
| Tip radius                             | 10 nm                               |
| Oscillation equilibration time         | 300 fundamental periods (~0.021 ns) |

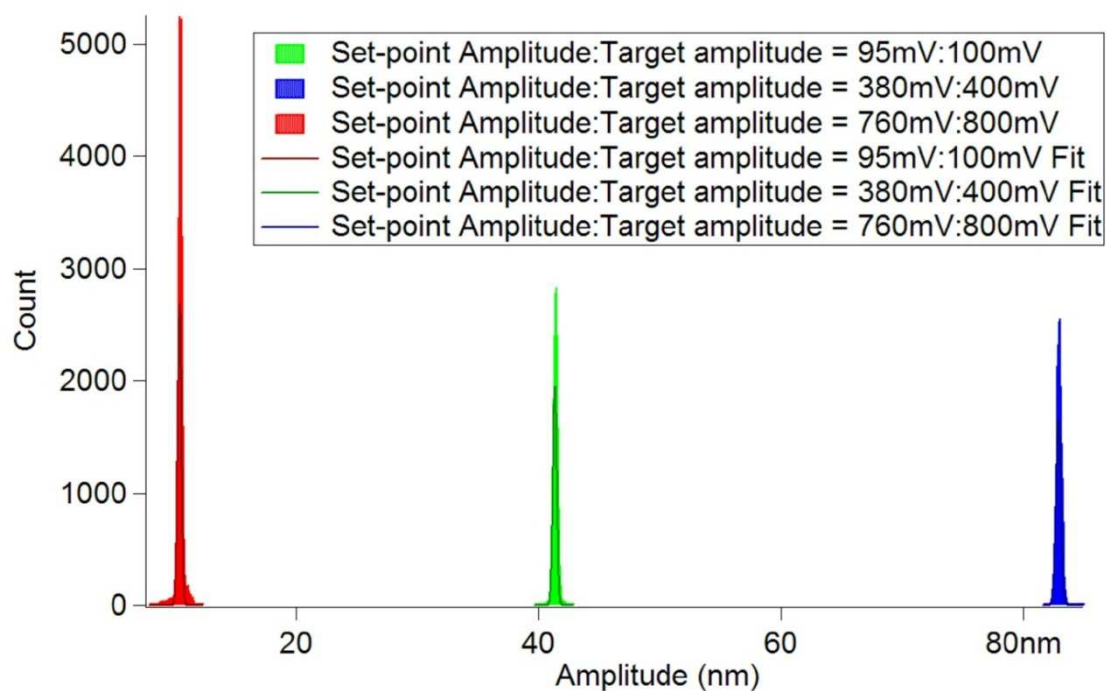

**Figure S1.** Histogram of amplitude distributions for a few combinations of set-point and free amplitude.

**Table S2.** Mean amplitude from the photodiode detector for a few typical experiments.

| Set-point amplitude (mV):<br>Free amplitude (mV) <sup>a</sup> | Mean Amplitude (nm) | Standard Deviation (nm) |
|---------------------------------------------------------------|---------------------|-------------------------|
| 95 : 100                                                      | 10.42               | 0.07                    |
| 380 : 400                                                     | 41.37               | 0.07                    |
| 760 : 800                                                     | 82.9                | 0.09                    |

<sup>a</sup>The experimental relationship between the photodiode reading in Volts and the spatial amplitude in nm was obtained through the standard calibration procedure based on measurements of the cantilever deflection (in Volts) for known vertical cantilever displacements (in nm).

Once the amplitude range from the photodiode detector was obtained, a simulation was conducted such that its amplitude was equal to the amplitude setpoint minus three standard deviations. The tip-sample force trajectory obtained was then used to estimate the maximum AFM tapping force. An example of tip and tip-sample force trajectory is provided in Figure S2. The normalized pressure level at each condition (Table S3) was calculated by dividing the maximum tip-sample force observed in the steady state trajectory by the nominal area of the AFM tip used in the experiments, equal to the area of a circle having the same radius as the tip radius of curvature.

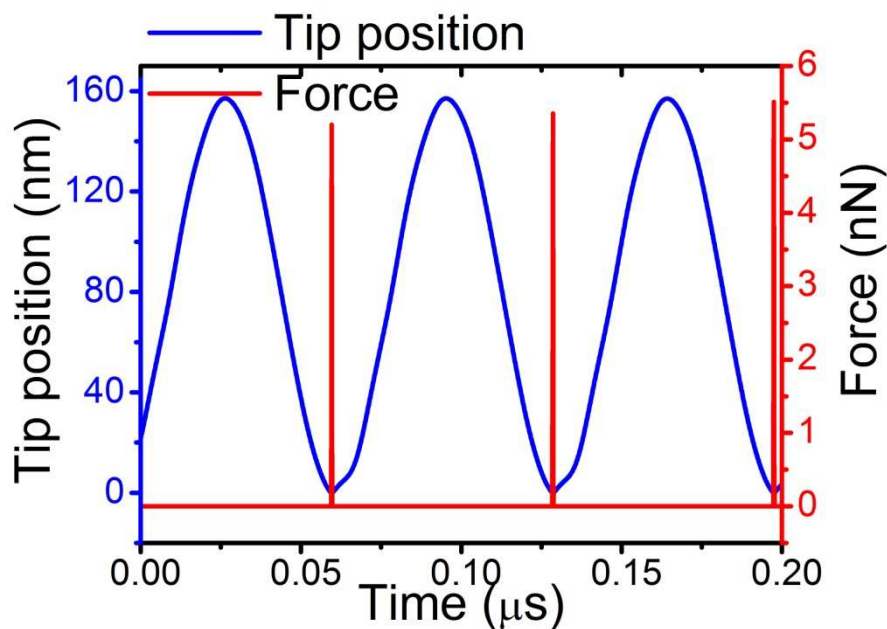

**Figure S2.** The example of tip trajectory at set-point amplitude : free amplitude ratio equal to 760 mV : 800 mV.

**Table S3.** Forces and pressures calculated through simulation for a few experimental cases.

| <b>Experiment</b>                                       | <b>Simulation</b>                                  |                                                    |                                                        |                                                    |
|---------------------------------------------------------|----------------------------------------------------|----------------------------------------------------|--------------------------------------------------------|----------------------------------------------------|
| <b>Setpoint amplitude (mV):<br/>Free amplitude (mV)</b> | <b>Average<br/>Peak Force<br/>(nN)<sup>a</sup></b> | <b>Maximum<br/>Peak Force<br/>(nN)<sup>b</sup></b> | <b>Average Peak<br/>Pressure<br/>(MPa)<sup>c</sup></b> | <b>Maximum Peak<br/>Pressure (MPa)<sup>d</sup></b> |
| 95 : 100                                                | 0.4                                                | 0.5                                                | 16.4                                                   | 21.1                                               |
| 380 : 400                                               | 2.6                                                | 2.9                                                | 104                                                    | 117                                                |
| 760 : 800                                               | 5.2                                                | 5.5                                                | 206                                                    | 220                                                |

<sup>a</sup>This value corresponds to the peak tip-sample force observed throughout the tip trajectory having an amplitude equal to the amplitude setpoint.

<sup>b</sup>This value corresponds to the peak tip-sample force observed throughout the tip trajectory having the lowest amplitude value in the amplitude control interval.

<sup>c</sup>This is the pressure corresponding to the average peak force.

<sup>d</sup>This is the pressure corresponding to the maximum peak force.

## References:

1. Melcher, J.; Xu, X.; Raman, A.; *Appl. Phys. Lett.* **2008**, *93*, 093111.
2. Xu, X.; Melcher, J.; Basak, S.; Reifenberger, R.; Raman, A.; *Phys. Rev. Lett.* **2009**, *102*, 060801.
3. Chawla, G.; Solares, S.D.; *Meas. Sci. Technol.* **2009**, *20*, 015501.
4. Herruzo, E.T.; Garcia, R.; *Appl. Phys. Lett.* **2007**, *91*, 143113.
5. Garcia, R.; Perez, R.; *Surf. Sci. Rep.* **2002**, *47*, 197.
6. Solares, S.D.; *Meas. Sci. Technol.* **2007**, *18*, 592.
